# Supplementary material
Source: PubMed Central journal article supplement (PMC5937269)
Supplement: NIHMS961800-supplement-supplemntal_table.pdf [file NIHMS961800-supplement-supplemntal_table.pdf]

**Supplemental Table 1. Major contributors of total niacin intake in the Nurses' Health Study (NHS) 1984 and Health Professionals Follow-Up Study (HPFS) 1986**

| <b>Major contributors of total niacin intake</b> | <b>NHS 1984</b> | <b>HPFS 1986</b> |
|--------------------------------------------------|-----------------|------------------|
| Multivitamins                                    | 31.4%           | 27.9%            |
| B vitamin supplements                            | 12.9%           | 12.0%            |
| Red meat                                         | 9.8%            | 8.1%             |
| Coffee                                           | 8.3%            | 2.6%             |
| Poultry                                          | 7.0%            | 10.8%            |
| Breakfast cereal                                 | 4.8%            | 5.7%             |
| Fish                                             | 3.5%            | 4.1%             |

For Peer Review

Supplemental Table 2. Hazard ratios (and 95% confidence intervals) of skin cancer by dietary niacin intake in the Nurses' Health Study (NHS, 1984-2010), and Health Professionals Follow-Up Study (HPFS, 1986-2010)

|                             | Quintile of dietary niacin intake |                   |                   |                   |                   | P for trend |
|-----------------------------|-----------------------------------|-------------------|-------------------|-------------------|-------------------|-------------|
|                             | 1                                 | 2                 | 3                 | 4                 | 5                 |             |
| <b>Basal cell carcinoma</b> |                                   |                   |                   |                   |                   |             |
| <b>NHS</b>                  |                                   |                   |                   |                   |                   |             |
| Mean dietary niacin, mg/d   | 15.9                              | 18.6              | 20.3              | 22.1              | 26.0              |             |
| No. of cases/person-years   | 2420/276156                       | 2763/295854       | 2776/299596       | 2820/300206       | 2557/281281       |             |
| Age-adjusted                | 1 (referent)                      | 1.05 (0.99, 1.10) | 1.03 (0.97, 1.09) | 1.04 (0.99, 1.10) | 1.01 (0.96, 1.07) | 0.89        |
| Multivariate-adjusted *     | 1 (referent)                      | 1.00 (0.95, 1.06) | 0.97 (0.92, 1.03) | 0.98 (0.93, 1.04) | 0.97 (0.92, 1.03) | 0.22        |
| <b>HPFS</b>                 |                                   |                   |                   |                   |                   |             |
| Mean dietary niacin, mg/d   | 19.9                              | 23.3              | 25.6              | 28.2              | 33.7              |             |
| No. of cases/ person-years  | 1771/151284                       | 1931/159064       | 2061/159067       | 2081/155552       | 2076/151994       |             |
| Age-adjusted                | 1 (referent)                      | 1.05 (0.99, 1.12) | 1.12 (1.06, 1.20) | 1.15 (1.08, 1.22) | 1.16 (1.08, 1.23) | <0.001      |
| Multivariate-adjusted *     | 1 (referent)                      | 1.02 (0.95, 1.08) | 1.07 (1.00, 1.14) | 1.09 (1.02, 1.16) | 1.11 (1.04, 1.19) | <0.001      |
| <b>Pooled†</b>              |                                   |                   |                   |                   |                   |             |
| Age-adjusted                | 1 (referent)                      | 1.05 (1.01, 1.09) | 1.07 (0.99, 1.17) | 1.09 (0.99, 1.20) | 1.08 (0.95, 1.23) | 0.27        |
| Multivariate-adjusted *     | 1 (referent)                      | 1.01 (0.97, 1.05) | 1.02 (0.93, 1.11) | 1.03 (0.93, 1.14) | 1.04 (0.91, 1.19) | 0.64        |
| <b>Squamous cell cancer</b> |                                   |                   |                   |                   |                   |             |
| <b>NHS</b>                  |                                   |                   |                   |                   |                   |             |
| No. of cases/ person-years  | 242/277415                        | 282/297273        | 271/301031        | 269/301675        | 261/282580        |             |
| Age-adjusted                | 1 (referent)                      | 1.06 (0.89, 1.25) | 0.99 (0.83, 1.17) | 0.98 (0.82, 1.16) | 1.02 (0.86, 1.22) | 0.91        |
| Multivariate-adjusted *     | 1 (referent)                      | 1.00 (0.84, 1.19) | 0.92 (0.77, 1.09) | 0.91 (0.76, 1.08) | 0.98 (0.82, 1.17) | 0.55        |
| <b>HPFS</b>                 |                                   |                   |                   |                   |                   |             |
| No. of cases/ person-years  | 246/152758                        | 237/160696        | 257/160789        | 255/157275        | 210/153810        |             |
| Age-adjusted                | 1 (referent)                      | 0.93 (0.78, 1.12) | 1.01 (0.85, 1.20) | 1.02 (0.85, 1.21) | 0.85 (0.71, 1.02) | 0.19        |
| Multivariate-adjusted *     | 1 (referent)                      | 0.88 (0.74, 1.06) | 0.94 (0.79, 1.13) | 0.95 (0.79, 1.13) | 0.84 (0.69, 1.01) | 0.15        |
| <b>Pooled†</b>              |                                   |                   |                   |                   |                   |             |
| Age-adjusted                | 1 (referent)                      | 0.99 (0.88, 1.13) | 1.00 (0.88, 1.13) | 1.00 (0.88, 1.13) | 0.93 (0.78, 1.12) | 0.27        |
| Multivariate-adjusted *     | 1 (referent)                      | 0.94 (0.83, 1.07) | 0.93 (0.82, 1.05) | 0.93 (0.82, 1.05) | 0.91 (0.78, 1.06) | 0.13        |
| <b>Melanoma</b>             |                                   |                   |                   |                   |                   |             |
| <b>NHS</b>                  |                                   |                   |                   |                   |                   |             |
| No. of cases/ person-years  | 91/277535                         | 96/297423         | 113/301164        | 105/301808        | 99/282728         |             |
| Age-adjusted                | 1 (referent)                      | 0.97 (0.73, 1.29) | 1.12 (0.85, 1.47) | 1.03 (0.78, 1.36) | 1.03 (0.78, 1.38) | 0.72        |
| Multivariate-adjusted *     | 1 (referent)                      | 0.92 (0.69, 1.22) | 1.03 (0.78, 1.36) | 0.95 (0.71, 1.26) | 0.98 (0.73, 1.30) | 0.96        |

**HPFS**

| No. of cases/ person-years | 72/152900    | 77/160809         | 82/160960         | 68/157422         | 84/153901         |      |
|----------------------------|--------------|-------------------|-------------------|-------------------|-------------------|------|
| Age-adjusted               | 1 (referent) | 1.03 (0.74, 1.41) | 1.10 (0.80, 1.52) | 0.94 (0.67, 1.31) | 1.16 (0.84, 1.59) | 0.48 |
| Multivariate-adjusted *    | 1 (referent) | 0.99 (0.72, 1.37) | 1.06 (0.77, 1.46) | 0.90 (0.65, 1.26) | 1.15 (0.83, 1.58) | 0.51 |
| <b>Pooled<sup>†</sup></b>  |              |                   |                   |                   |                   |      |
| Age-adjusted               | 1 (referent) | 0.99 (0.80, 1.23) | 1.11 (0.90, 1.37) | 0.99 (0.80, 1.23) | 1.09 (0.88, 1.34) | 0.44 |
| Multivariate-adjusted *    | 1 (referent) | 0.95 (0.77, 1.18) | 1.04 (0.84, 1.29) | 0.93 (0.75, 1.15) | 1.05 (0.85, 1.30) | 0.64 |

\* Adjusted for family history of melanoma (yes vs. no), natural hair color (red, blonde, light brown, dark brown, black), number of arm moles (0, 1-2, 3-9, ≥10), skin reaction to sun exposure as a child/adolescent (none/some redness, burn, painful burn/blisters), number of lifetime blistering sunburns (0, 1-4, 5-9, ≥10), average time spent in direct sunlight since high school (<2, 2-5, 6-9, ≥10 hrs/wk), cumulative UV flux since baseline (quintiles) body mass index (<25.0, 25.0-29.9, 30.0-34.9, ≥35.0 kg/m<sup>2</sup>), physical activity (quintiles), smoking status (never, past, current with 1-14, 15-24, or ≥25 cigarettes/d), intakes of total energy (quintiles), alcohol (0, 0.1-4.9, 5.0-9.9, 10.0-19.9, ≥20.0 g/d), and citrus intake (quintiles). Analyses for women were also adjusted for menopausal status and postmenopausal hormone use.

<sup>†</sup> The multivariate-adjusted hazard ratios from each cohort were combined with meta-analytic methods using random effects model.

**Supplemental Table 3. Hazard ratios (and 95% confidence intervals) of skin cancer by supplemental niacin intake in the Nurses' Health Study (NHS, 1984-2010), and Health Professionals Follow-Up Study (HPFS, 1986-2010)**

|                                | Category of supplemental niacin intake |                   |                   |                   |                   | P for trend |
|--------------------------------|----------------------------------------|-------------------|-------------------|-------------------|-------------------|-------------|
|                                | None                                   | 0.1-2.0 mg/d      | 2.1-10.0 mg/d     | 10.1-18.0 mg/d    | > 18.0 mg/d       |             |
| <b>Basal cell carcinoma</b>    |                                        |                   |                   |                   |                   |             |
| <b>NHS</b>                     |                                        |                   |                   |                   |                   |             |
| Mean supplemental niacin, mg/d | 0                                      | 0.3               | 5.8               | 13.5              | 46.0              |             |
| No. of cases/ person-years     | 2137/289169                            | 2256/290097       | 2774/279937       | 1855/180775       | 4314/413116       |             |
| Age-adjusted                   | 1 (referent)                           | 1.03 (0.97, 1.09) | 1.13 (1.06, 1.20) | 1.17 (1.10, 1.25) | 1.23 (1.17, 1.30) | <0.001      |
| Multivariate-adjusted *        | 1 (referent)                           | 1.02 (0.96, 1.08) | 1.06 (1.00, 1.12) | 1.07 (1.00, 1.14) | 1.10 (1.04, 1.16) | <0.001      |
| <b>HPFS</b>                    |                                        |                   |                   |                   |                   |             |
| Mean supplemental niacin, mg/d | 0                                      | 0.5               | 5.8               | 13.4              | 57.4              |             |
| No. of cases/ person-years     | 3199/304171                            | 725/53100         | 1642/115065       | 1038/76411        | 3316/228213       |             |
| Age-adjusted                   | 1 (referent)                           | 1.05 (0.96, 1.14) | 1.16 (1.09, 1.23) | 1.10 (1.03, 1.19) | 1.21 (1.15, 1.27) | <0.001      |
| Multivariate-adjusted *        | 1 (referent)                           | 0.98 (0.90, 1.07) | 1.08 (1.01, 1.15) | 0.99 (0.92, 1.07) | 1.07 (1.02, 1.13) | 0.02        |
| <b>Pooled†</b>                 |                                        |                   |                   |                   |                   |             |
| Age-adjusted                   | 1 (referent)                           | 1.03 (0.98, 1.08) | 1.14 (1.09, 1.19) | 1.14 (1.08, 1.20) | 1.22 (1.18, 1.26) | 0.001       |
| Multivariate-adjusted *        | 1 (referent)                           | 1.00 (0.96, 1.05) | 1.07 (1.02, 1.11) | 1.03 (0.96, 1.11) | 1.08 (1.04, 1.12) | <0.001      |
| <b>Squamous cell cancer</b>    |                                        |                   |                   |                   |                   |             |
| <b>NHS</b>                     |                                        |                   |                   |                   |                   |             |
| No. of cases/ person-years     | 182/290299                             | 209/291287        | 322/281326        | 201/181745        | 411/415317        |             |
| Age-adjusted                   | 1 (referent)                           | 1.03 (0.84, 1.26) | 1.07 (0.89, 1.29) | 1.08 (0.88, 1.32) | 1.12 (0.93, 1.33) | 0.23        |
| Multivariate-adjusted *        | 1 (referent)                           | 1.01 (0.82, 1.23) | 0.97 (0.80, 1.17) | 0.93 (0.75, 1.14) | 0.92 (0.76, 1.10) | 0.24        |
| <b>HPFS</b>                    |                                        |                   |                   |                   |                   |             |
| No. of cases/ person-years     | 321/306927                             | 124/53707         | 212/116433        | 134/77314         | 414/230947        |             |
| Age-adjusted                   | 1 (referent)                           | 1.25 (1.00, 1.56) | 1.13 (0.94, 1.35) | 1.08 (0.88, 1.33) | 1.25 (1.07, 1.45) | 0.03        |
| Multivariate-adjusted *        | 1 (referent)                           | 1.07 (0.86, 1.34) | 0.98 (0.82, 1.18) | 0.88 (0.72, 1.09) | 1.00 (0.86, 1.17) | 0.66        |
| <b>Pooled†</b>                 |                                        |                   |                   |                   |                   |             |
| Age-adjusted                   | 1 (referent)                           | 1.13 (0.93, 1.36) | 1.10 (0.96, 1.25) | 1.08 (0.93, 1.25) | 1.19 (1.06, 1.33) | 0.12        |
| Multivariate-adjusted *        | 1 (referent)                           | 1.03 (0.89, 1.20) | 0.97 (0.85, 1.11) | 0.90 (0.78, 1.05) | 0.96 (0.86, 1.09) | 0.21        |
| <b>Melanoma</b>                |                                        |                   |                   |                   |                   |             |
| <b>NHS</b>                     |                                        |                   |                   |                   |                   |             |
| No. of cases/ person-years     | 69/290391                              | 115/291358        | 97/2815285        | 75/181851         | 148/415530        |             |
| Age-adjusted                   | 1 (referent)                           | 1.61 (1.19, 2.17) | 1.18 (0.86, 1.62) | 1.47 (1.05, 2.06) | 1.33 (1.00, 1.78) | 0.69        |
| Multivariate-adjusted *        | 1 (referent)                           | 1.61 (1.20, 2.18) | 1.11 (0.80, 1.53) | 1.37 (0.98, 1.91) | 1.23 (0.92, 1.65) | 0.85        |

**HPFS**

|                            |              |                   |                   |                   |                   |      |
|----------------------------|--------------|-------------------|-------------------|-------------------|-------------------|------|
| No. of cases/ person-years | 124/307076   | 29/53789          | 66/116554         | 39/77386          | 125/231187        |      |
| Age-adjusted               | 1 (referent) | 1.04 (0.68, 1.59) | 1.19 (0.87, 1.63) | 1.06 (0.73, 1.53) | 1.19 (0.92, 1.53) | 0.25 |
| Multivariate-adjusted *    | 1 (referent) | 0.94 (0.61, 1.45) | 1.09 (0.80, 1.50) | 0.92 (0.63, 1.34) | 1.02 (0.79, 1.33) | 0.95 |
| <b>Pooled<sup>†</sup></b>  |              |                   |                   |                   |                   |      |
| Age-adjusted               | 1 (referent) | 1.33 (0.87, 2.03) | 1.19 (0.95, 1.48) | 1.26 (0.91, 1.74) | 1.25 (1.03, 1.51) | 0.40 |
| Multivariate-adjusted *    | 1 (referent) | 1.26 (0.75, 2.13) | 1.10 (0.88, 1.38) | 1.13 (0.77, 1.66) | 1.11 (0.91, 1.35) | 0.88 |

\* Adjusted for family history of melanoma (yes vs. no), natural hair color (red, blonde, light brown, dark brown, black), number of arm moles (0, 1-2, 3-9,  $\geq 10$ ), skin reaction to sun exposure as a child/adolescent (none/some redness, burn, painful burn/blisters), number of lifetime blistering sunburns (0, 1-4, 5-9,  $\geq 10$ ), average time spent in direct sunlight since high school (<2, 2-5, 6-9,  $\geq 10$  hrs/wk), cumulative UV flux since baseline (quintiles) body mass index (<25.0, 25.0-29.9, 30.0-34.9,  $\geq 35.0$  kg/m<sup>2</sup>), physical activity (quintiles), smoking status (never, past, current with 1-14, 15-24, or  $\geq 25$  cigarettes/d), intakes of total energy (quintiles), alcohol (0, 0.1-4.9, 5.0-9.9, 10.0-19.9,  $\geq 20.0$  g/d), and citrus intake (quintiles). Analyses for women were also adjusted for menopausal status and postmenopausal hormone use.

<sup>†</sup> The multivariate-adjusted hazard ratios from each cohort were combined with meta-analytic methods using random effects model.

Supplemental Table 4. Pooled multivariate hazard ratios\* (and 95% confidence intervals) of skin cancer by total niacin intake stratified by sun exposure related factors in the Nurses' Health Study (NHS) and Health Professionals Follow-Up Study (HPFS)

|                                                                             | Quintile of total niacin intake |                   |                   |                   |                   | P for trend |
|-----------------------------------------------------------------------------|---------------------------------|-------------------|-------------------|-------------------|-------------------|-------------|
|                                                                             | 1                               | 2                 | 3                 | 4                 | 5                 |             |
| <b>Annual UV flux at residence &lt;= 113</b>                                |                                 |                   |                   |                   |                   |             |
| BCC                                                                         | 1 (referent)                    | 0.98 (0.93, 1.04) | 0.99 (0.94, 1.05) | 1.06 (0.96, 1.16) | 1.00 (0.94, 1.06) | 0.65        |
| SCC                                                                         | 1 (referent)                    | 0.85 (0.70, 1.01) | 0.92 (0.67, 1.29) | 0.94 (0.78, 1.12) | 0.81 (0.67, 0.97) | 0.08        |
| Melanoma                                                                    | 1 (referent)                    | 1.11 (0.84, 1.47) | 1.14 (0.60, 2.17) | 0.93 (0.69, 1.25) | 1.28 (0.93, 1.76) | 0.20        |
| <b>Annual UV flux at residence &gt; 113</b>                                 |                                 |                   |                   |                   |                   |             |
| BCC                                                                         | 1 (referent)                    | 1.03 (0.96, 1.11) | 1.06 (1.00, 1.13) | 1.10 (1.03, 1.17) | 1.10 (1.03, 1.17) | 0.06        |
| SCC                                                                         | 1 (referent)                    | 0.90 (0.70, 1.15) | 0.83 (0.70, 1.00) | 0.81 (0.51, 1.29) | 0.85 (0.71, 1.01) | 0.26        |
| Melanoma                                                                    | 1 (referent)                    | 0.92 (0.55, 1.54) | 0.89 (0.39, 2.03) | 0.91 (0.65, 1.28) | 1.01 (0.47, 2.17) | 0.12        |
| <b>Average time spent in direct sunlight since high school=Below median</b> |                                 |                   |                   |                   |                   |             |
| BCC                                                                         | 1 (referent)                    | 1.02 (0.87, 1.20) | 1.05 (0.92, 1.20) | 1.12 (0.92, 1.37) | 1.12 (0.99, 1.26) | 0.002       |
| SCC                                                                         | 1 (referent)                    | 0.83 (0.67, 1.03) | 0.78 (0.64, 0.97) | 0.88 (0.63, 1.23) | 0.83 (0.68, 1.02) | 0.48        |
| Melanoma                                                                    | 1 (referent)                    | 0.94 (0.62, 1.42) | 0.92 (0.43, 1.99) | 0.98 (0.64, 1.48) | 1.41 (0.78, 2.55) | 0.01        |
| <b>Average time spent in direct sunlight since high school=Above median</b> |                                 |                   |                   |                   |                   |             |
| BCC                                                                         | 1 (referent)                    | 1.00 (0.93, 1.07) | 1.05 (0.97, 1.12) | 1.09 (0.99, 1.19) | 1.04 (0.94, 1.14) | 0.49        |
| SCC                                                                         | 1 (referent)                    | 0.93 (0.62, 1.41) | 0.89 (0.64, 1.23) | 0.96 (0.79, 1.18) | 0.90 (0.68, 1.19) | 0.66        |
| Melanoma                                                                    | 1 (referent)                    | 1.21 (0.84, 1.73) | 1.06 (0.73, 1.53) | 1.02 (0.70, 1.48) | 1.29 (0.89, 1.85) | 0.23        |
| <b>History of blistering sunburns=Yes</b>                                   |                                 |                   |                   |                   |                   |             |
| BCC                                                                         | 1 (referent)                    | 1.00 (0.95, 1.05) | 1.00 (0.96, 1.05) | 1.06 (1.01, 1.11) | 1.03 (0.99, 1.08) | 0.06        |
| SCC                                                                         | 1 (referent)                    | 0.87 (0.70, 1.09) | 0.83 (0.72, 0.96) | 0.88 (0.75, 1.03) | 0.86 (0.75, 0.98) | 0.31        |
| <b>History of blistering sunburns=No</b>                                    |                                 |                   |                   |                   |                   |             |
| BCC                                                                         | 1 (referent)                    | 1.02 (0.60, 1.75) | 1.23 (0.91, 1.65) | 1.20 (0.77, 1.88) | 1.08 (0.80, 1.46) | 0.63        |
| SCC                                                                         | 1 (referent)                    | 0.85 (0.56, 1.30) | 0.81 (0.53, 1.25) | 0.95 (0.63, 1.43) | 0.64 (0.41, 1.00) | 0.08        |

\*The multivariate-adjusted hazard ratios from each cohort were combined with meta-analytic methods using random effects model. The hazard ratios from each cohorts were adjusted for family history of melanoma (yes vs. no), natural hair color (red, blonde, light brown, dark brown, black), number of arm moles (0, 1-2, 3-9, ≥10), skin reaction to sun exposure as a child/adolescent (none/some redness, burn, painful burn/blisters), number of lifetime blistering sunburns (0, 1-4, 5-9, ≥10), average time spent in direct sunlight since high school (<2, 2-5, 6-9, ≥10 hrs/wk), cumulative UV flux since baseline (quintiles), body mass index (<25.0, 25.0-29.9, 30.0-34.9, ≥35.0 kg/m<sup>2</sup>), physical activity (quintiles), smoking status (never, past, current with 1-14, 15-24, or ≥25 cigarettes/d), intakes of total energy (quintiles), alcohol (0, 0.1-4.9, 5.0-9.9, 10.0-19.9, ≥20.0 g/d), and citrus intake (quintiles). Analyses for women were also adjusted for menopausal status and postmenopausal hormone use (premenopausal, postmenopausal never, past, or current use)
